# Supplementary material
Source: Springer Nature journal article supplement (https://www.springermedizin.de/resource/supplementary/12879_2012_2258_MOESM2_ESM.pdf/9445468)

■ Hyperglycemia ■ IFG ■ Diabetes

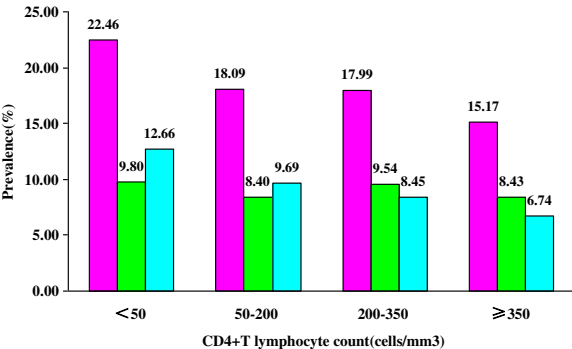

Supplement: MOESM2 [file 9445468]
